# Supplementary material
Source: HighWire-hosted journal article supplement (https://bmjopenquality.bmj.com/content/13/1/e002689)
Supplement: inline-supplementary-material-1 [file inline-supplementary-material-1.pdf]

**Supplementary Table 1. Evolution of MYCaW® coding framework, from original integrative oncology framework to frailty framework.**

This table documents why concern categories from the original coding framework were either removed, amended to broaden their inclusion criteria, amalgamated into other existing categories, or where new categories to reflect frailty related concerns were added in.

| Super-category                                   | Original categories (2007/2015)                                                                                                                                                                                                                                                                                                              | Final Frailty Categories (2023)                                                                                                                                                                                                                                                                                                                                                                                                                                                                                                                                                                                                                                                                                                                                                                                                                                                                                              |
|--------------------------------------------------|----------------------------------------------------------------------------------------------------------------------------------------------------------------------------------------------------------------------------------------------------------------------------------------------------------------------------------------------|------------------------------------------------------------------------------------------------------------------------------------------------------------------------------------------------------------------------------------------------------------------------------------------------------------------------------------------------------------------------------------------------------------------------------------------------------------------------------------------------------------------------------------------------------------------------------------------------------------------------------------------------------------------------------------------------------------------------------------------------------------------------------------------------------------------------------------------------------------------------------------------------------------------------------|
| <b>S1 - Psychological and Emotional Concerns</b> | “Adapting and coping”<br>“Body image concerns”<br>“Confidence issues”<br>“Depression/low mood”<br>“Emotional problems”<br>“Family and relationships”<br><br>“Fear and anxiety”<br><br><br>“Psychological issues”<br>“Regaining balance and normality”<br>“Sleep problems”<br>“Stress and tension”<br>“Support”<br><br>“The future”<br>-<br>- | <b>Removed - not mentioned</b><br><b>Removed - not mentioned</b><br>“Confidence issues”<br>“Depression/low mood”<br><i>Developed - reworded to “Mental Health concerns”</i><br><i>Developed - included concerns between carers and patients, family relationships in general and pets as family members</i><br><i>Amended - to “Anxiety and Worries” as mentions of fear were not present in this data set. Many more concerns relating to worries were present instead.</i><br><br><i>Amalgamated - into the mental health category</i><br><i>Amalgamated - now reflected in practical concerns category on work.</i><br>“Sleep problems”<br><b>Removed - not mentioned</b><br><b>Removed - support features in other categories in a different context, therefore overlap of term avoided</b><br>“The future”<br><b>New – “Loneliness, isolation and bereavement”</b><br><b>New – “Dementia/memory problems/confusion”</b> |

|                                                       |                                           |                                                                        |
|-------------------------------------------------------|-------------------------------------------|------------------------------------------------------------------------|
|                                                       | -                                         | <b>New – “Lack of motivation”</b>                                      |
| <b>S2 - Physical Concerns</b>                         | “Hot flushes and night sweats”            | <b>Removed - not mentioned</b>                                         |
|                                                       | “Fertility”                               | <b>Removed - not mentioned</b>                                         |
|                                                       | “Pains/aches”                             | “Pain/aches”                                                           |
|                                                       | “Physical problems not related to cancer” | <i>Reworded - minor change to “Other physical problems/conditions”</i> |
|                                                       | “Poor energy levels”                      | <i>Reworded - minor change to “Poor energy levels or fatigue”</i>      |
|                                                       | “Cancer recurrence”                       | <b>Removed - not mentioned/ cancer specific</b>                        |
|                                                       | “Spreading of cancer”                     | <b>Removed - not mentioned/cancer specific</b>                         |
|                                                       | “Weight change”                           | “Weight change”                                                        |
|                                                       | -                                         | <b>New – “Diabetes/pre-diabetes”</b>                                   |
|                                                       | -                                         | <b>New – “Continence”</b>                                              |
|                                                       | -                                         | <b>New – “Sight and hearing”</b>                                       |
|                                                       | -                                         | <b>New – “Mobility”</b>                                                |
|                                                       | -                                         | <b>New – “Developed further into Falls and balance issues”</b>         |
|                                                       | -                                         | <b>New – “Breathing problems”</b>                                      |
| <b>S3 Hospital Cancer Treatment Concerns</b>          | “Cancer treatment in general”             | <b>Whole super-category removed as cancer specific</b>                 |
| - Whole supercategory removed as cancer specific      | “Side effects of chemotherapy”            |                                                                        |
|                                                       | “Side effects of hormonal treatment”      |                                                                        |
|                                                       | “Side effects of surgery”                 |                                                                        |
|                                                       | “Side effects of radiotherapy”            |                                                                        |
| <b>S3 - Healthcare and service provision concerns</b> | -                                         | <b>New – “Support and information”</b>                                 |
| - New supercategory developed                         | -                                         | <b>New – “Healthcare and social care provision”</b>                    |
|                                                       | -                                         | <b>New – “Physiotherapy and strength”</b>                              |
|                                                       | -                                         | <b>New – “Medication”</b>                                              |
| <b>S4 - Concerns about Wellbeing</b>                  | “Exercise/Physical activity”              | “Physical activity or exercise”                                        |
|                                                       | “General wellbeing”                       | <i>Developed - into “General health and wellbeing”</i>                 |
|                                                       | “Healing”                                 | <b>Removed - not mentioned</b>                                         |

|                                                                       |                                                       |                                                                                                                                                      |
|-----------------------------------------------------------------------|-------------------------------------------------------|------------------------------------------------------------------------------------------------------------------------------------------------------|
|                                                                       | “Information and guidance on Complementary therapies” | <b>Removed - not mentioned</b>                                                                                                                       |
|                                                                       | “Nutrition and diet”                                  | “Nutrition and diet”                                                                                                                                 |
|                                                                       | “Relaxation”                                          | <b>Removed - not mentioned</b>                                                                                                                       |
|                                                                       | “Spiritual wellbeing - meaning and peace”             | <b>Removed - not mentioned</b>                                                                                                                       |
|                                                                       | “Spiritual wellbeing – faith”                         | <b>Removed - not mentioned</b>                                                                                                                       |
|                                                                       | -                                                     | <b>New – “Getting out”</b>                                                                                                                           |
|                                                                       | -                                                     | <b>New – “Independence”</b>                                                                                                                          |
|                                                                       | -                                                     | <b>New – “Social interaction”</b>                                                                                                                    |
| <b>S5 - Practical Concerns</b>                                        | “Finances”                                            | “Finances”                                                                                                                                           |
|                                                                       | “Work”                                                | <i>Amalgamated</i> - into “other practical concerns” below in context of getting back to normal activities (majority of this population are retired) |
|                                                                       | -                                                     | <b>New – “Housing”</b>                                                                                                                               |
|                                                                       | -                                                     | <b>New – “Managing the household/assistance with daily living”</b>                                                                                   |
|                                                                       | -                                                     | <b>New – “Transport”</b>                                                                                                                             |
|                                                                       | -                                                     | <b>New – “Other practical concerns”</b>                                                                                                              |
|                                                                       | -                                                     | <b>New – “Digital”</b>                                                                                                                               |
| <b>T6 Statements that can’t be coded - New supercategory added in</b> | -                                                     | <b>New - Statements that can’t be coded - this was added in to enable the statements lacking context, missing concerns etc to be identified.</b>     |

### Supplementary information - Description of Frailty services

**Complex Care at Home (CC@H)** aims to proactively manage patients with complex health needs, including those who are frail, in the community, who may previously have been high users of primary care and/or urgent care services. The service aims to prevent hospital admissions where possible. CC@H is a proactive model of care support that is run in Cheltenham and Gloucester by a team of Community Matrons, Case Managers, Dementia Matrons, Physiotherapists, Occupational Therapists, Dietitians, Social Care Practitioners and Wellbeing Coordinators. Video of a patients' experience of the service: <https://www.youtube.com/watch?v=tclookwrZRE>

**South Cotswolds Frailty Service** is a person-centred community service embedded in and delivered by the South Cotswolds PCN. The service works with people who have increasing in frailty and at risk of hospital admission or long-term care and tries to help them build up resilience and independence. The team is comprised of Community Matrons and Wellbeing Coordinators and they work directly from the GP patient lists, where people are risk stratified according to their level of frailty. An overview of a patient's experience of South Cotswolds Frailty Service can be found here: <https://www.youtube.com/watch?v=bykrZXXew6w>
